RESEARCH ARTICLE

# Synergistic effects of proteinaceous pheromone and nitrogen starvation on male gametogenesis in the anisogamous volvocine alga *Eudorina*

Hiroko Kawai-Toyooka<sup>1,2,3\*</sup>, Makoto Ono<sup>3,4</sup>, Takashi Hamaji<sup>4,5</sup>, Hisayoshi Nozaki<sup>6,7,8</sup>, Masafumi Hirono<sup>1,3\*</sup>

**1** Department of Frontier Bioscience, Hosei University, Koganei, Tokyo, Japan, **2** Department of Biological Sciences, Faculty of Science and Engineering, Chuo University, Tokyo, Japan, **3** Graduate School of Science and Engineering, Hosei University, Koganei, Tokyo, Japan, **4** Center for Advanced Biomedical Sciences (TWINs), Waseda University, Tokyo, Japan, **5** Donald Danforth Plant Science Center, St. Louis, Missouri, United States of America, **6** Department of Biological Sciences, Graduate School of Science, The University of Tokyo, Tokyo, Japan, **7** Biodiversity Division, National Institute for Environmental Studies, Tsukuba, Ibaraki, Japan, **8** Department of Chemical and Biological Sciences, Faculty of Science, Japan Women's University, Tokyo, Japan

☞ These authors equally contributed as first authors.

\* [hiroko.toyooka.37@hosei.ac.jp](mailto:hiroko.toyooka.37@hosei.ac.jp) (HK-T), [hirono@hosei.ac.jp](mailto:hirono@hosei.ac.jp) (MH)

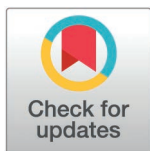

## OPEN ACCESS

**Citation:** Kawai-Toyooka H, Ono M, Hamaji T, Nozaki H, Hirono M (2025) Synergistic effects of proteinaceous pheromone and nitrogen starvation on male gametogenesis in the anisogamous volvocine alga *Eudorina*. PLoS One 20(11): e0326066. <https://doi.org/10.1371/journal.pone.0326066>

**Editor:** Thomas Roach, University of Innsbruck, AUSTRIA

**Received:** May 24, 2025

**Accepted:** September 8, 2025

**Published:** November 21, 2025

**Copyright:** © 2025 Kawai-Toyooka et al. This is an open access article distributed under the terms of the [Creative Commons Attribution License](https://creativecommons.org/licenses/by/4.0/), which permits unrestricted use, distribution, and reproduction in any medium, provided the original author and source are credited.

**Data availability statement:** All relevant data are within the paper and its [Supporting Information](#) files.

**Funding:** This work was supported by MEXT/JSPS KAKENHI Grant Numbers JP17K07510,

## Abstract

In volvocine algae, gametogenesis is triggered by different cues depending on the species and their sexual systems. In isogamous unicellular organisms such as *Chlamydomonas reinhardtii*, which produce gametes of equal size and morphology, nitrogen depletion induces gametogenesis. In contrast, in oogamous multicellular species of the genus *Volvox*, which produce large, immobile eggs and small motile sperm, male gametogenesis is induced by a sex pheromone secreted by sperm packets (SPs), i.e., bundles of male gametes. *Eudorina*, an anisogamous multicellular volvocine alga that produces motile gametes of different sizes, is known to form SPs under nitrogen-depleted conditions. Intriguingly, a pheromone-like factor, present in male conditioned medium (CM), has also been implicated in SP formation. To clarify the relative contributions of nitrogen starvation and pheromone signaling, we conducted semi-quantitative analyses of SP induction using synchronously cultured male colonies of *Eudorina*. When CM was added to male cultures during an early maturation stage, most colonies formed SPs regardless of nitrogen availability. However, when the CM was diluted 100- to 100,000-fold, SP formation was significantly more efficient under nitrogen-depleted conditions than under nitrogen-replete conditions. Notably, SPs never formed without the addition of CM, even in a nitrogen-depleted medium. The SP-inducing activity of the CM was found to markedly decrease with protease treatment. These findings suggest that spermatogenesis in *Eudorina* is induced by a proteinaceous sex pheromone secreted by male colonies, and that nitrogen depletion, while not essential, enhances this pheromone activity.

JP21K06294, JP22H05692 (to HK-T) and JP16H02518 (to HN). The funders had no role in study design, data collection and analysis, decision to publish, or preparation of the manuscript.

**Competing interests:** The authors have declared that no competing interests exist.

## Introduction

Mating of complementary haploid cells (gametes) is a fundamental step in sexual reproduction across all major eukaryotic lineages [1]. Based on gamete morphology, mating systems are generally classified into three types: isogamy, where the two gametes are the same size; anisogamy, where smaller male gametes fuse with larger female gametes; and oogamy, where small, motile sperm fertilize large immobile eggs. Isogamy is considered the ancestral form, while anisogamy likely evolved, eventually giving rise to oogamy through increasing differentiation between male and female gametes [2].

The volvocine lineage serves as an excellent model system for studying the evolution of gamete dimorphism, as its members represent a range of reproductive strategies within a relatively recent divergence (Fig 1) [3–5]. For example, *Chlamydomonas reinhardtii*, a unicellular isogamous species, produces *plus* and *minus* mating-type gametes in response to nitrogen starvation [6]. Similarly, *Gonium pectorale*, an isogamous colonial species with 8 or 16 cells, undergoes gametogenesis under nitrogen-deficient conditions [7] or after prolonged cultivation [8,9]. Thus, apparently nitrogen starvation is a key environmental cue for gametogenesis in isogamous volvocine species. In contrast, both male and female gametogenesis in the oogamous genus *Volvox* relies on sex pheromones secreted by preexisting sperm packets (SP), bundles of male gametes [10,11]. The pheromones are highly potent; for example, a pheromone in *V. carteri*, a ~32-kDa glycoprotein, can induce gametogenesis at concentrations as low as  $<10^{-16}$  M [10,12–14]. *V. carteri* can also undergo gametogenesis in response to the environmental cue of heat shock; however, this stimulus acts indirectly by inducing pheromone [15]. These examples suggest that, during the evolutionary transition from isogamy to oogamy in the volvocine lineage, the mechanism of gametogenesis induction also shifted from a system based on environmental nitrogen resources to one relying on specific pheromones. This raises the intriguing possibility that the evolution of sexual dimorphism in volvocine green algae is linked to the change in the induction mechanism of gametogenesis.

*Eudorina*, an anisogamous colonial genus in the volvocine lineage, offers a valuable system for investigating the relationship between the gamete dimorphism and the gametogenesis regulation. Colonies of male and female genotypes—each comprising 16 or 32 cells—are morphologically indistinguishable during vegetative life cycle. However, upon entering the sexual reproduction process, male colonies differentiate into SPs with distinct morphology. This SP formation can be induced by culturing the colonies under nitrogen-starved conditions [17,18]. Nevertheless, a previous study on *Eudorina elegans* reported that the addition of conditioned medium (CM) from a dense male culture also accelerated SP formation in a fresh male culture [19]. Therefore, the relative contributions of nitrogen starvation and sex pheromone to gametogenesis in *Eudorina* remain unclear.

To better understand how evolutionary changes in gamete morphology relate to the shift in gametogenesis regulation within the volvocine lineage, it is essential to clarify the relative contributions of “*Chlamydomonas*-type” nitrogen starvation and “*Volvox*-type” pheromone signaling in male gametogenesis of *Eudorina*. In this study,

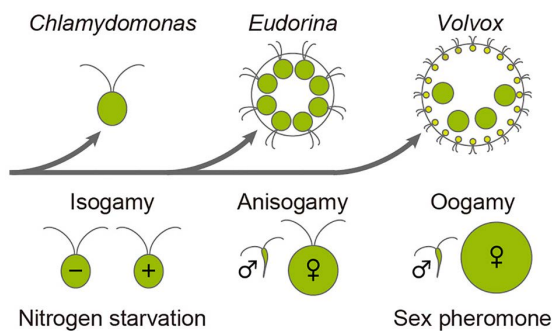

**Fig 1. Evolutionary transitions of gamete dimorphism and gametogenesis induction cues in volvocine algae.** Gamete types are illustrated for three representative volvocine genera: *Chlamydomonas* exhibits isogamy with *minus* (–) and *plus* (+) mating types, *Eudorina* shows anisogamy with motile male (♂; sperm) and female (♀) gametes, and *Volvox* displays oogamy with motile male (♂; sperm) and immotile female (♀; egg) gametes. The phylogenetic relationships among these genera are based on [16]. In *Chlamydomonas*, gametogenesis is induced by nitrogen starvation, whereas in *Volvox*, it is induced by a sex pheromone [6,10].

<https://doi.org/10.1371/journal.pone.0326066.g001>

we investigated the effects of the male-derived CM and nitrogen starvation on male gametogenesis in *Eudorina*. Our results suggest that, at the anisogamous stage in the volvocine lineage, gametogenesis is predominantly induced by pheromone signaling, with nitrogen starvation playing a limited supporting role.

## Results

### Synchronous culture of *Eudorina*

To investigate the effects of the CM and nitrogen starvation on gametogenesis in *Eudorina*, we established cultures with a synchronized life cycle, as SP formation is closely linked to developmental stage (Fig 2A, [19]). Although a previous study showed that synchronous culture of *Eudorina elegans* can be achieved under a 16-h light/8-h dark condition at low population density [20], light-dark cycle alone was insufficient to synchronize the colony development for the strain used in this study (*Eudorina* sp. originating from Taiwan [18]; hereafter *Eudorina*) [21]. To overcome this, we manually isolated colonies at the pre-hatching stage—a morphologically distinct stage easily identifiable under a microscope (Fig 2B). When these colonies were incubated in a medium containing both carbon and nitrogen sources under a 16-h light/8-h dark cycle, most daughter colonies hatched from the mother colonies within 3 h of culture (S1 Fig, Panel B). The hatched colonies grew synchronously without cell division during the light phase (Fig 2CD; S1 Fig, Panel C). We refer to this as the maturation stage after the corresponding stage in the *Volvox* life cycle ([10]; S2 Fig). At the start of the dark period, the colonies entered the cleavage stage, during which cells divided (S1 Fig, Panel C). At the beginning of the next light period, colonies at the late cleavage stage were observed together with newly hatched colonies, reflecting variation in developmental timing among colonies (Fig 2E; S1 Fig, Panels B and C). On average, 83.1% of the initially hatched colonies released next-generation colonies within 30 h. These results demonstrate that our culture method achieves sufficient synchronization of colony development for investigating SP-inducing factors.

### Proteinaceous factor(s) in male CM induce SP formation

Using synchronized cultures, we evaluated the SP-inducing activity of the CM obtained from a high-density culture of male colonies grown asynchronously for 3–5 days [22]. The CM was added to a synchronized male culture at the start of the light period (corresponding to the pre-hatching stage or a stage slightly after hatching), making up one-third of the total medium volume. Approximately 60% of the colonies differentiated into bouquet-shaped SPs within ~24 h of the CM addition, whereas no SP was formed in the control culture without CM (Fig 2F). These results clearly demonstrate that the

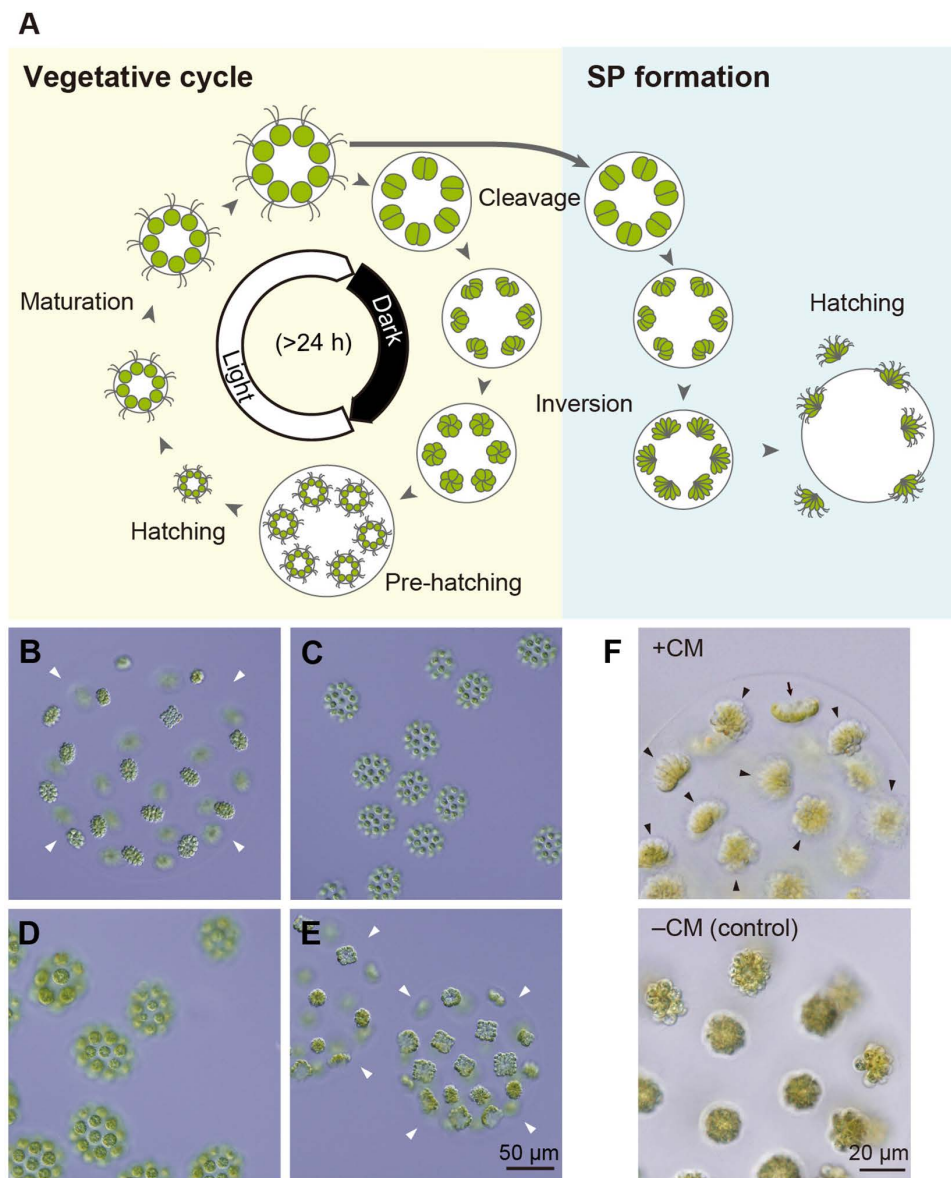

**Fig 2. Synchronization of the vegetative cycle and SP formation in *Eudorina*.** (A) Schematic representation of the vegetative cycle (yellow-shaded area) and SP formation (blue-shaded area). Newly hatched colonies from the parental colony grow without cell division during the maturation stage. During the cleavage stage, cells within the colony undergo four or five rounds of division. The resulting cell clusters (embryos) then undergo inversion to form spherical embryos. These embryos further develop and reach the pre-hatching stage. Under a 16-h light/8-h dark cycle, the pre-hatching stage coincides with the beginning of the light period, while the cleavage stage approximately corresponds to the start of the dark period. In the SP formation pathway, embryos undergo inversion and subsequently develop into SPs. (B–E) Vegetative colonies (VCs) of the *Eudorina* male strain under synchronous growth conditions. (B) A pre-hatching colony observed 1.5 h after the start of the light period. Colonies at this stage were isolated for synchronous culture. (C, D) Colonies at the maturation stage observed at 6 h (C) and 17 h (D) after the start of the light period, with all colonies developing synchronously. (E) Late cleavage-stage colonies observed at 26.5 h. Arrowheads indicate the edges of the parental colonies' extracellular matrix. (F) SP formation induced by the addition of male CM. Male colonies grown under synchronous conditions were incubated with male-derived CM for approximately 24 h. Bouquet-shaped SPs (arrowheads) were observed within the parental colonies, along with a pre-inversion embryo (arrow) that could not yet be identified as either VC or SP. As a control, when CM was not added (–CM), only spherical VCs were observed. The difference in cell color between (B–E) and (F) is probably due to differences in the optical conditions of the microscope. The male strain used in (B–F) was 2017–0525-EF2–15.

<https://doi.org/10.1371/journal.pone.0326066.g002>

male-derived CM contains factor(s) that induce SP formation, and that nitrogen starvation is not required for the induction when sufficient CM is added.

In *V. carteri*, gametogenesis is induced by a proteinaceous sex pheromone present in the male CM [13]. To determine whether the SP-inducing factor(s) in the male CM of *Eudorina* is similarly proteinaceous, we tested the activity of CM after treating it with various concentrations of pronase, a protease mixture known to degrade the *Volvox* pheromone [23], with or without heat treatment (Fig 3). Heat treatment alone reduced SP formation from ~87% to ~30%. Pronase treatment further decreased activity in a dose-dependent manner (Fig 3). As a control, we tested pronase that had been heat-treated separately (i.e., without mixing with CM) and found that it had no effect on SP formation, either inhibitory or inductive (S3 Fig). Taken together, these results confirm that the reduction in SP formation was due to proteolysis of CM components.

To obtain further evidence supporting the proteinaceous nature of the factor(s) in CM, we next examined whether the SP-forming activity could be precipitated by ammonium sulfate. When ammonium sulfate was added to CM to a final concentration of 80% saturation, a small amount of activity was detected in the supernatant, but most of the activity was recovered in the precipitate (Fig 4). These results strongly suggest that, as in *V. carteri*, the SP-inducing factor(s) in the male *Eudorina* CM is also proteinaceous.

### Sensitivity to CM depends on the developmental stage

For SP-formation in *V. carteri* to occur, its reproductive cells, gonidia, must be exposed to the sex pheromone 6–8 hours prior to the start of cell division [14]. To investigate whether *Eudorina* exhibits a similar sensitive period in its life cycle, we next examined the responsiveness of synchronously cultured male colonies to the added CM at various developmental stages. As described above, once colonies hatch, they enter the maturation stage, which continues throughout the light phase, and then enter the cleavage stage in the subsequent dark phase (Fig 2; S1 Fig). When colonies from the pre-hatching stage up to the middle of the maturation stage (~9h after cultivation began) were treated with the CM, SP

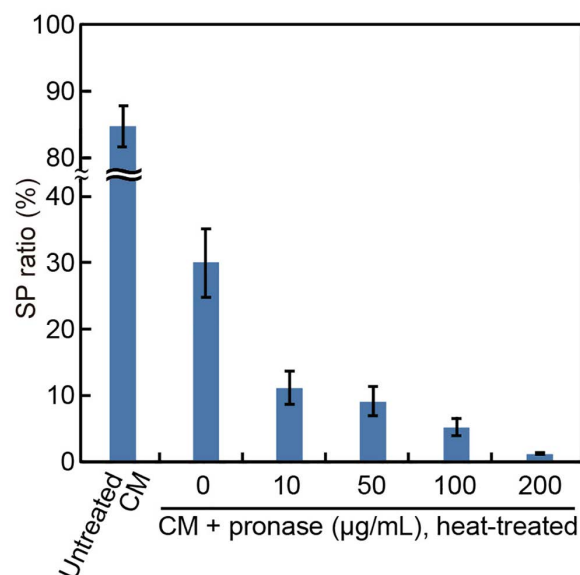

**Fig 3. Effect of pronase pretreatment of male CM on SP formation.** Male CM was treated with pronase of the concentrations indicated on the abscissa, heat-inactivated (80°C, 20 min), and then applied to male colonies at a final volume of 10%. As a control, untreated CM (without pronase and heat treatment) was applied at the same volume. The SP ratio (%) was calculated as the percentage of SPs relative to the total number of colonies (SPs and VCs) in each sample. Each value represents the mean ± standard error (SE) from three biological replicates (≥70 colonies in total). The experiment was independently repeated, yielding consistent results. The male strain used was 2022–1122-EF4-M1.

<https://doi.org/10.1371/journal.pone.0326066.g003>



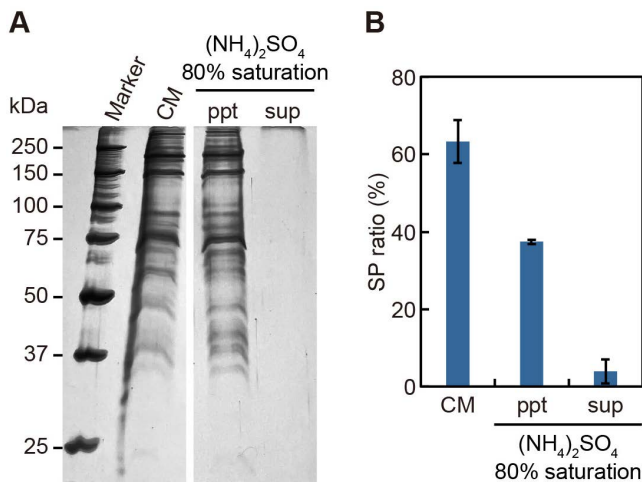

**Fig 4. SP-forming activity of CM precipitated by 80% saturated ammonium sulfate.** (A) SDS-PAGE of CM proteins fractionated by ammonium sulfate precipitation. Ammonium sulfate  $(\text{NH}_4)_2\text{SO}_4$  was added to CM to a final concentration of 80% saturation, and the sample was fractionated into precipitate (ppt) and supernatant (sup) by centrifugation. The original gel image is provided in S4 Fig in the Supporting Information. (B) SP-forming activity of each fraction. Each fraction was applied to vegetative male colonies at a final volume equivalent to 10% (v/v) of CM, and the SP ratios (%) were quantified as described in Fig 3. Values represent the mean  $\pm$  SE from three biological replicates ( $\geq 21$  colonies in total). The male strain used was 2022–1122-EF4-M1.

<https://doi.org/10.1371/journal.pone.0326066.g004>

formation rate was  $\sim 90\%$  (Fig 5). However, when the CM treatment was performed on colonies in the latter half of the maturation stage ( $\sim 12$  h after cultivation began), the SP formation rate decreased to  $\sim 60\%$ . Once the colonies had entered the cell cleavage stage, no SP formation was observed. These results indicate that *Eudorina* cells must be exposed to the SP-inducing factors in CM at least 6–8 h before the start of cell division to differentiate into SP.

### Nitrogen starvation promotes SP formation in diluted CM

We next examined the influence of nitrogen starvation on the SP formation efficiency after the addition of diluted CM. When 1/10 volume of CM had been added to the culture, the SP formation efficiency did not noticeably change depending on nitrogen availability (Fig 6). However, as the amount of CM was further reduced, the SP formation efficiency tended to increase in the nitrogen-deficient medium. Promotion by nitrogen deficiency became more pronounced at lower CM concentrations. With the CM volume reduced to 1/100,000 of the culture volume, SP formation occurred only in the nitrogen-deficient medium. SP formation did not occur in the complete absence of CM (Fig 6). These results indicate that while nitrogen starvation alone cannot induce SP formation, it significantly enhances CM activity when CM concentration is low.

### Discussion

This study demonstrates that in *Eudorina*, an anisogamous volvocine alga, a proteinaceous sex pheromone present in the male CM is the primary inducer of SP formation, and that this effect is enhanced by nitrogen starvation. Although the SP-inducing activity in the CM has already been reported in *Eudorina elegans* [19], our current study has, for the first time, shown that the responsible factor is proteinaceous. These findings are particularly intriguing given *Eudorina*'s intermediate evolutionary position within the volvocine lineage—between *Chlamydomonas*, where nitrogen starvation is the primary inducer, and *Volvox*, where sex pheromones play the major role (Fig 1) [6,10,16,18,24,25].

The cooperative effect of sex pheromone and nitrogen starvation on SP formation may also be conserved in *Pleodorina*, another anisogamous member of the volvocine lineage. This possibility is supported by previous studies showing that SP formation in *Pleodorina* (*P. japonica* and *P. starrii*) was induced by culturing the colonies to high density, followed by a

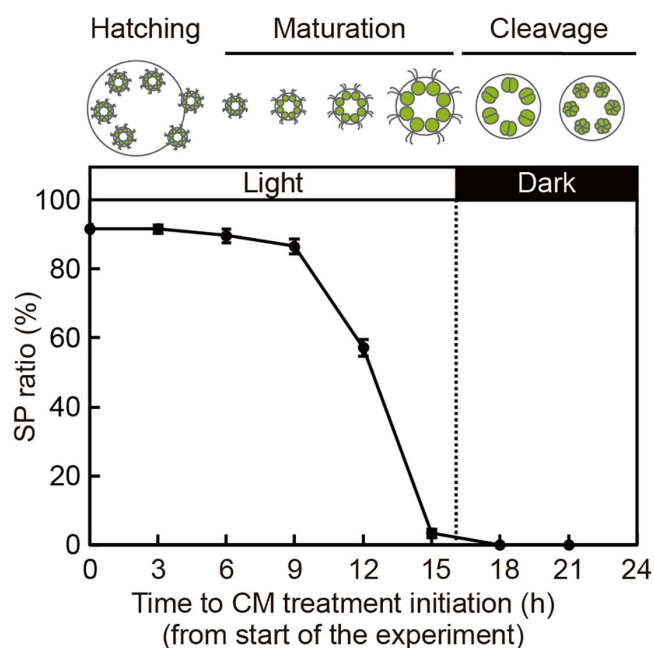

**Fig 5. Time course of CM-induced SP formation efficiency during colony development of *Eudorina*.** Male colonies at various life cycle stages were treated with CM at a final volume of 10%, and the SP ratios (%) were quantified. Each value represents the mean  $\pm$  SE from three biological replicates ( $\geq 43$  colonies in total). Schematic illustrations above the graph depict the developmental stages of the colonies at each time point, along with the light conditions (16-h light/8-h dark). The male strain used was 2022–1122-EF4-M1.

<https://doi.org/10.1371/journal.pone.0326066.g005>

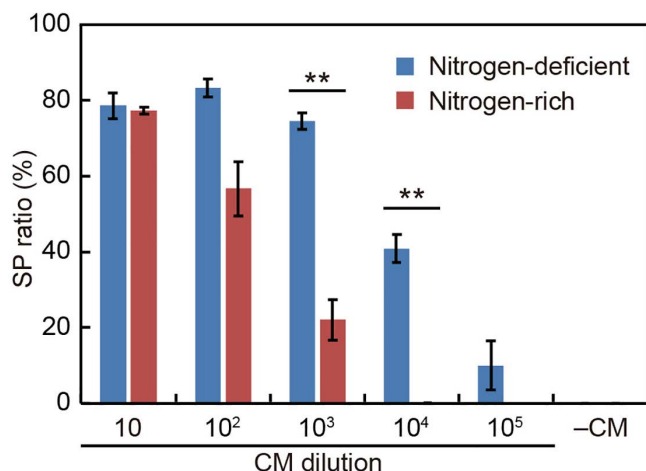

**Fig 6. Effect of CM dilution and nitrogen availability on male CM-induced SP formation.** SP ratio (%) was measured after applying serially diluted CM ( $10$ – $10^5$ ) to male colonies in either nitrogen-deficient (blue) or nitrogen-rich (red) medium. Each value represents the mean  $\pm$  SE from three biological replicates ( $\geq 68$  colonies in total). Asterisks indicate  $p < 0.01$  based on an independent two-sample, two-tailed t-test. The experiments were independently repeated and essentially the same results were obtained. The male strain used was 2022–1122-EF4-M1.

<https://doi.org/10.1371/journal.pone.0326066.g006>

reduction in the nitrogen concentration [26–29]. These conditions for SP formation may reflect synergistic effects of sex pheromone and nitrogen depletion, as we demonstrated with *Eudorina* in the present study, suggesting that the mechanism underlying SP formation is shared among various species of anisogamous volvocine algae.

In *Volvox*, the effect of nitrogen starvation on SP formation has not been reported. In *V. carteri*, SP formation is induced by treating vegetative colonies (VCs) with male CM containing the sex pheromone, even in the presence of sufficient nitrogen sources [30–32]. In other *Volvox* species, such as *V. farrisii*, *V. africanus*, and *V. reticuliferus*, gametogenesis is spontaneously induced during continuous cultivation in nitrogen-containing medium [33–37]. Thus, gametogenesis in all studied *Volvox* species tends to occur under relatively nitrogen-rich conditions, suggesting that nitrogen starvation is unlikely to promote sexual induction in oogamous volvocine algae. In contrast, in *Chlamydomonas*, sex pheromones have not been reported to play a role in gametogenesis [6,38].

Taken together, these previous findings and our results here allow us to classify the gamete inducers in volvocine algae into three types: the “*Chlamydomonas*-type,” in which nitrogen starvation alone serves as the trigger; the “*Eudorina*-type,” in which both sex pheromones and nitrogen starvation act cooperatively; and the “*Volvox*-type,” in which sex pheromones govern gametogenesis, with no apparent involvement of nitrogen starvation. Since these three types correspond to the three modes of sexual reproduction modes (isogamy, anisogamy, and oogamy), we can imagine that the mechanism of gametogenesis induction and the gamete morphology may have evolved in close association.

Our preliminary observation showed that the sex pheromone of *V. carteri* is unable to induce SP formation in *Eudorina* (no SPs were observed in over 200 colonies counted,  $n=3$ ). Therefore, pheromone signaling in these organisms appears to be species-specific. However, there are some similarities in the pheromone actions in the two species. In *Volvox*, cells within a colony are differentiated into two types, somatic and reproductive. When the sex pheromone acts on gonidia, they undergo differentiation into SPs through an intermediate state called androgonidia ([10]; S2 Fig). For this differentiation to occur, gonidia must be exposed to the sex pheromone 6–8 hours before the start of cell division [14]. This temporal requirement is similar to the pheromone sensitivity period in *Eudorina*, where vegetative cells must be exposed to the sex pheromone 6–8 hours prior to the initiation of cell division (Fig 5). Thus, despite the difference in the type of cells that differentiate into SPs, i.e., vegetative cells in *Eudorina* and gonidia in *Volvox*, the timing of pheromone sensitivity appears similar between these organisms.

In *V. carteri*, the sex pheromone also induces sexual development in female colonies [10]. In this study, we did not examine whether the *Eudorina* CM has a similar effect on female colonies, as female gametes cannot be morphologically distinguished from vegetative cells. Future work will test this by examining the expression of female gametogenesis-specific genes in response to *Eudorina* CM.

A critical next step is to identify the sex pheromone molecule in *Eudorina*. In *V. carteri*, the sex pheromone is a glycoprotein that contains a conserved pherophorin domain, which is a characteristic domain of the major extracellular-matrix protein pherophorin in volvocine algae [10]. A recent genome analysis has revealed that, although no clear orthologs of the *Volvox* sex pheromone gene are present, as many as 69 genes encoding pherophorins are found in this organism [22,39]. These genes represent potential candidates for the *Eudorina* sex pheromone; however, their identification will require functional analyses that link specific gene products to biological activity.

In summary, our study demonstrates the synergetic effects of sex pheromones and nitrogen starvation on SP formation in *Eudorina*, thereby positioning this species as a significant evolutionary link between *Chlamydomonas* and *Volvox*. The categorization of gamete inducers into three types—*Chlamydomonas*-type, *Eudorina*-type, and *Volvox*-type—suggests a correlation between gametogenesis induction mechanisms and sexual reproduction modes. These findings provide valuable insights into the evolutionary transition of sexual induction mechanisms in colonial algae.

## Materials and methods

### Strains

Strains used were progenies of the *Eudorina* sp. strains 2006–703-Eu-15 (male, NIES-2735) and 2006–703-Eu-14 (female, NIES-2734), originally collected in Taiwan [18]. The species epithet cannot be assigned due to unresolved taxonomic issues [18]. Because long-term subculturing led to a decline in SP formation efficiency in the male strain, we



maintained male strains with high SP formation efficiency through repeated crossing of existing strains. The strains used for analyses were as follows: 2010–623-F1-E3 (NIES-4100; [22]), an F1 male strain resulting from the initial parental cross; 2017–0525-EF2–15 (NIES-4564) and 2017–0525-EF2–21 (NIES-4565), male and female strains, respectively, generated from a cross between the F1 male strain and the female parental strain; 2021–0602-EF3-M6 (NIES-4567) and 2021–0602-EF3-M4 (NIES-4568), male and female strains, respectively, generated from a cross between 2017–0525-EF2–15 and 0525-EF2–21; 2022–1122-EF4-M1, a male strain generated from a cross between 2021–0602-EF3-M6 and 2021–0602-EF3-M4.

## Culture

*Eudorina* was maintained in 18 x 150 mm screw-cap tubes containing 10 mL of artificial freshwater-6 (AF-6) medium [40], with ~300  $\mu$ L of culture transferred to fresh medium every four weeks. Cultures were grown at  $25 \pm 2^\circ\text{C}$  under a 14-h light/10-h dark or 12-h light/12-h dark cycle, illuminated by cool white fluorescent and/or LED lamps at an intensity of  $<100 \mu\text{mol photons m}^{-2} \text{s}^{-1}$ .

For synchronous growth of VCs, ~30  $\mu$ L of stock culture was transferred to a 60-mm Petri dish containing 10 mL of nitrogen-rich medium (VTAC; [40]; S1 Table) and incubated for 3 days at  $32 \pm 1.5^\circ\text{C}$  under a 16-h light/8-h dark cycle, with illumination from cool white fluorescent and/or LED lamps at  $230\text{--}260 \mu\text{mol photons m}^{-2} \text{s}^{-1}$ . At the beginning of the light period, 10 pre-hatching colonies were selected under a binocular dissecting microscope, washed with VTAC medium to remove any residual CM, and then cultured in 3 mL of fresh VTAC medium in a 30-mm Petri dish for the indicated time.

## CM preparation

For small-scale CM preparation, ~400  $\mu$ L of stock culture of the male strain maintained for ~4 weeks was transferred to 10 mL of VTAC in a 60-mm Petri dish and cultured at  $25 \pm 2^\circ\text{C}$  under a 14-h light/10-h dark cycle with a light intensity of  $180\text{--}280 \mu\text{mol photons m}^{-2} \text{s}^{-1}$  for 3 days. The culture was then diluted with twice the volume of nitrogen-deficient medium (mating medium; [26]; S1 Table) and further incubated for an additional 1–2 days.

For large-scale CM preparation, ~40 mL of the stock culture of the male strain was transferred to 300 mL of VTAC in a 500 mL flask. The culture was incubated under aeration at  $32 \pm 1.5^\circ\text{C}$  under a 16-h light/8-h dark cycle with a light intensity of  $170\text{--}220 \mu\text{mol photons m}^{-2} \text{s}^{-1}$  for 3 days.

After confirming SP formation, the culture was centrifuged, and the supernatant was filtered through a  $0.22\text{-}\mu\text{m}$  filter to remove cells and debris. The resulting CM was stored at  $-80^\circ\text{C}$ . For the experiment shown in Fig 6, 1 mL of large-scale prepared CM was transferred into a 14 kDa-cut-off dialysis membrane (Viskase) and dialyzed against 1.8 L of 10 mM HEPES buffer (pH 7.8) overnight at  $4^\circ\text{C}$  before use.

## SP formation assay

Pre-hatching VCs were selected and washed with either VTAC or mating medium. A total of 8–20 colonies were then transferred to each well of a 12-well plate containing 2 mL of the respective medium. Alternatively, ~26  $\mu$ L of a suspension containing ~100 freshly hatched colonies, prepared under synchronous growth conditions, was added to each well. Each well was supplemented with CM or with either distilled water or 10 mM HEPES buffer (pH 7.8) as a negative control. For the experiment shown in Fig 5, 8 pre-hatching colonies were transferred to each well simultaneously, and CM was added to different wells at 3-h intervals. The plates were incubated at  $32^\circ\text{C}$  under a light intensity of  $280\text{--}380 \mu\text{mol photons m}^{-2} \text{s}^{-1}$  with a 16-h light/8-h dark cycle for 24–30 h, until most SPs and VCs had hatched from the mother colonies. Cultures were then fixed by adding glutaraldehyde to a final concentration of 0.25% (v/v). SPs and VCs were counted in 200  $\mu$ L of the culture medium. The SP ratio was calculated as the proportion of SPs relative to the total number of colonies. All experiments were independently repeated, and representative results are presented.

## Pronase treatment

Small-scale CM prepared from the male strain was incubated with the indicated concentration of pronase (#10165921001; Roche) at 37°C for 1 h. To inactivate the pronase, the mixture was heated to 80°C for 20 min. After cooling, 200  $\mu$ L of the mixture was subjected to the SP formation assay with mating medium. To examine the effect of heat-treated pronase on CM formation, the enzyme was pre-heated as described above and then mixed with either CM or mating medium to a final concentration of 200  $\mu$ g/mL, followed by the SP formation assay.

## Ammonium sulfate precipitation of CM

Ammonium sulfate was gradually added to 30 mL of CM with gentle stirring on ice to a final concentration of 80% saturation. After centrifugation at 14,000  $\times g$  for 30 min at 4°C, the resulting precipitate was resuspended in 1 mL of phosphate buffer (pH 7.4). Both the precipitate and supernatant fractions were transferred into a 14 kDa cut-off dialysis membrane and dialyzed overnight at 4°C against 2 L of 10 mM HEPES buffer (pH 7.8). An aliquot of each fraction was diluted with mating medium and used to assay SP formation activity. For SDS-PAGE analysis, each fraction was concentrated 200-fold by trichloroacetic acid precipitation, and samples corresponding to 2 mL of CM were separated on an 8% polyacrylamide gel, and visualized by silver staining (EzStain Silver; Atto).

## Light microscopy

Microscopic images were captured using an upright microscope (BX-53; Olympus) equipped with UPlanSApo 40X (NA 0.95) or 100X (NA 1.40) objective lenses (Olympus) and differential interference contrast (DIC) optics. Images were recorded with a DP71 camera (Olympus) controlled by DP controller software (version 1.2.1108; Olympus) and processed with Photoshop CC (version 20.0.8; Adobe).

## Supporting information

### S1 Fig. Quantitative analysis of vegetative colony (VC) development in synchronously cultured *Eudorina*. (A)

Schematic illustrations of representative developmental stages based on the time-course data in (B) and (C). The light–dark condition (16-h light/8-h dark) is indicated by the bar at the bottom. (B) Time course of the total colony number under synchronous culture conditions (see Materials and Methods). One hundred pre-hatching colonies were incubated in nitrogen-rich medium, and colonies were counted every 3 h. Daughter colonies were released by ~6 h (hatching stage), reaching ~250 colonies/mL, and the number then remained constant through the maturation and cleavage stages (~21 h). The second hatching stage began at ~24 h and continued until ~30 h. On average, 83.1% of the initially hatched colonies released next-generation colonies (~3,600 colonies/mL). Each value represents the mean  $\pm$  SE ( $n=3$ ). The male strain used was 2022–1122-EF4-M1. (C) Time course of the cleavage-stage colonies from the same experiment shown in (B). Colonies were classified as cleavage stage if they contained at least one embryo undergoing cell division. Cleavage-stage colonies appeared soon after the dark period began (~18 h), increased until ~27 h, overlapping with the second hatching stage (B), and were completed by ~30 h. Each value represents the mean  $\pm$  SE.

(PDF)

### S2 Fig. Schematic representation of the vegetative cycle and sperm packet (SP) formation in the *Volvox carteri* male strain (for comparison). In *Volvox*, the vegetative cycle (yellow-shaded area) takes ~48 h under a 16-h light/8-h dark cycle, compared to ~24 h in *Eudorina*. This longer duration is due to the prolonged expansion phase, during which both the parental colony and its enclosed daughter colonies expand for ~24 h after inversion. When gonidia sense the sex pheromone 6–8 h before the cleavage stage, they undergo modified type of embryogenesis to form a colony containing androgonidia (blue-shaded area). Subsequently, the androgonidia divide and form SPs through incomplete inversion.

(PDF)

**S3 Fig. Effect of heat-treated pronase on SP formation.** Pre-heated pronase was mixed with either mating medium or CM to a final concentration of 200 µg/mL (see Materials and Methods). These mixtures were added to cultures of vegetative male colonies at a final volume of 10% (v/v), and the SP ratios were measured. SP formation exceeded 80% in CM-treated cultures regardless of the presence of heat-treated pronase, while no SPs were formed in cultures without CM, regardless of the presence of heat-treated pronase. These results indicate that heat-treated pronase does not affect the SP formation. Each value represents the mean ± SE from three biological replicates (≥54 colonies in total). The male strain used was 2022–1122-EF4-M1.

(PDF)

**S4 Fig. Raw gel image corresponding to Fig 4.** The uncropped silver-stained SDS-PAGE gel image corresponding to Fig 4 is shown. Lanes labeled “(NH<sub>4</sub>)<sub>2</sub>SO<sub>4</sub> fraction #1–4” are not included in Fig 4. These lanes represent ammonium sulfate fractionation samples of CM (#1: 0–40% saturation; #2: 40–60% saturation; #3: 60–80% saturation; #4: final supernatant). They are presented here to show the entire gel but are not relevant to the present study.

(PDF)

**S1 Table. Composition of VTAC and mating medium based on [S1, S2].**

(PDF)

**S1 Dataset. The data underlying the graphs shown in Figs 3–6 (main text) and S1 Fig and S3 Fig (Supporting Information).**

(XLSX)

## Acknowledgments

We thank Ritsu Kamiya for critically reading the manuscript. We also thank Yumi Asano for technical assistance, Kohei Takahashi for sharing mating techniques, and Yoshiki Nishimura for experimental support. We are grateful to Takako Kato-Minoura for her continued encouragement and support.

## Author contributions

**Conceptualization:** Hiroko Kawai-Toyooka, Masafumi Hirono.

**Funding acquisition:** Hiroko Kawai-Toyooka, Hisayoshi Nozaki.

**Investigation:** Hiroko Kawai-Toyooka, Makoto Ono.

**Methodology:** Hiroko Kawai-Toyooka, Makoto Ono.

**Resources:** Takashi Hamaji, Hisayoshi Nozaki.

**Supervision:** Hisayoshi Nozaki, Masafumi Hirono.

**Visualization:** Hiroko Kawai-Toyooka.

**Writing – original draft:** Hiroko Kawai-Toyooka, Makoto Ono, Masafumi Hirono.

**Writing – review & editing:** Hiroko Kawai-Toyooka, Hisayoshi Nozaki, Masafumi Hirono.

## References

1. Goodenough U, Heitman J. Origins of eukaryotic sexual reproduction. Cold Spring Harb Perspect Biol. 2014;6(3):a016154. <https://doi.org/10.1101/cshperspect.a016154> PMID: 24591519
2. Parker GA. The origin and maintenance of two sexes (anisogamy), and their gamete sizes by gamete competition. In: Togashi T, Cox PA. The evolution of anisogamy: a fundamental phenomenon underlying sexual selection. Cambridge University Press. 2011. 17–74.
3. Nozaki H. Origin and evolution of the genera *Pleodorina* and *Volvox* (Volvocales). Biologia. 2003;58:425–31.

4. Herron MD, Hackett JD, Aylward FO, Michod RE. Triassic origin and early radiation of multicellular volvocine algae. *Proc Natl Acad Sci U S A*. 2009;106(9):3254–8. <https://doi.org/10.1073/pnas.0811205106> PMID: [19223580](#)
5. Umen J, Coelho S. Algal Sex Determination and the Evolution of Anisogamy. *Annu Rev Microbiol*. 2019;73:267–91. <https://doi.org/10.1146/annurev-micro-020518-120011> PMID: [31150584](#)
6. Harris EH. The *Chlamydomonas* Sourcebook: Introduction to Chlamydomonas and Its Laboratory Use: Academic Press; 2009.
7. Hamaji T, Ferris PJ, Coleman AW, Waffenschmidt S, Takahashi F, Nishii I, et al. Identification of the minus-dominance gene ortholog in the mating-type locus of *Gonium pectorale*. *Genetics*. 2008;178(1):283–94. <https://doi.org/10.1534/genetics.107.078618> PMID: [18202374](#)
8. Mogi Y, Hamaji T, Suzuki M, Ferris P, Mori T, Kabeya Y, et al. Evidence for tubular mating structures induced in each mating type of heterothallic *Gonium pectorale* (Volvocales, Chlorophyta). *J Phycol*. 2012;48(3):670–4. <https://doi.org/10.1111/j.1529-8817.2012.01149.x> PMID: [27011083](#)
9. Kawai-Toyooka H, Mori T, Hamaji T, Suzuki M, Olson BJSC, Uemura T, et al. Sex-specific posttranslational regulation of the gamete fusogen GCS1 in the isogamous volvocine alga *Gonium pectorale*. *Eukaryot Cell*. 2014;13(5):648–56. <https://doi.org/10.1128/EC.00330-13> PMID: [24632243](#)
10. Hallmann A. Extracellular Matrix and Sex-Inducing Pheromone in *Volvox*. *International Review of Cytology*. Elsevier. 2003. 131–82. [https://doi.org/10.1016/s0074-7696\(03\)01009-x](https://doi.org/10.1016/s0074-7696(03)01009-x)
11. Gilles R, Gilles C, Jaenicke L. Sexual differentiation of the green alga *Volvox carteri*. *Naturwissenschaften*. 1983;70(11):571–2. <https://doi.org/10.1007/bf00376679>
12. Starr RC, Jaenicke L. Purification and characterization of the hormone initiating sexual morphogenesis in *Volvox carteri* f. *nagariensis* lyengar. *Proc Natl Acad Sci U S A*. 1974;71(4):1050–4. <https://doi.org/10.1073/pnas.71.4.1050> PMID: [4524613](#)
13. Tschochner H, Lottspeich F, Sumper M. The sexual inducer of *Volvox carteri*: purification, chemical characterization and identification of its gene. *EMBO J*. 1987;6(8):2203–7. <https://doi.org/10.1002/j.1460-2075.1987.tb02491.x> PMID: [16453787](#)
14. Gilles R, Gilles C, Jaenicke L. Pheromone-binding and matrix-mediated events in sexual induction of *Volvox carteri*. *Z Naturforsch*. 1984;39(c):584–92.
15. Kirk DL, Kirk MM. Heat shock elicits production of sexual inducer in *Volvox*. *Science*. 1986;231(4733):51–4. <https://doi.org/10.1126/science.3941891> PMID: [3941891](#)
16. Nozaki H, Misawa K, Kajita T, Kato M, Nohara S, Watanabe MM. Origin and evolution of the colonial volvocales (Chlorophyceae) as inferred from multiple, chloroplast gene sequences. *Mol Phylogenet Evol*. 2000;17(2):256–68. <https://doi.org/10.1006/mpev.2000.0831> PMID: [11083939](#)
17. Nozaki H. Sexual reproduction in *Eudorina elegans* (chlorophyta, volvocales). *Bot Mag Tokyo*. 1983;96(2):103–10. <https://doi.org/10.1007/bf02491095>
18. Yamada T, Tsuchikane Y, Wu JT, Sekimoto H, Miyaji K, Nozaki H. Morphology and molecular phylogeny of *Eudorina* sp. (Volvocaceae, Chlorophyceae) from Taiwan. *Hikobia*. 2008;15:135–43.
19. Szostak JW, Sparkuhl J, Goldstein ME. Sexual induction in *Eudorina*: effects of light, nutrients and conditioned medium. *J Phycol*. 1973;9:215–8.
20. Kemp CK, Lee KA. Synchronous growth in the colonial *Eudorina elegans* (Chlorophyceae). *J Phycol*. 1976;12:105–9.
21. Yamashita S, Arakaki Y, Kawai-Toyooka H, Noga A, Hirono M, Nozaki H. Alternative evolution of a spheroidal colony in volvocine algae: developmental analysis of embryogenesis in *Astrephomene* (Volvocales, Chlorophyta). *BMC Evol Biol*. 2016;16(1). <https://doi.org/10.1186/s12862-016-0794-x>
22. Hamaji T, Kawai-Toyooka H, Uchimura H, Suzuki M, Noguchi H, Minakuchi Y, et al. Anisogamy evolved with a reduced sex-determining region in volvocine green algae. *Commun Biol*. 2018;1:17. <https://doi.org/10.1038/s42003-018-0019-5> PMID: [30271904](#)
23. Darden WH. Hormonal control of sexuality in the genus *Volvox*. *Ann NY Acad Sci*. 1970;175:757–63.
24. Ma X, Shi X, Wang Q, Zhao M, Zhang Z, Zhong B. A Reinvestigation of Multiple Independent Evolution and Triassic-Jurassic Origins of Multicellular Volvocine Algae. *Genome Biol Evol*. 2023;15(8):evad142. <https://doi.org/10.1093/gbe/evad142> PMID: [37498572](#)
25. Starr RC, O'neil RM, Miller CE. L-Glutamic acid as a mediator of sexual morphogenesis in *Volvox capensis*. *Proc Natl Acad Sci U S A*. 1980;77(2):1025–8. <https://doi.org/10.1073/pnas.77.2.1025> PMID: [16592768](#)
26. Nozaki H, Kuroiwa H, Mita T, Kuroiwa T. *Pleodorina japonica* sp. nov. (Volvocales, Chlorophyta) with bacteria-like endosymbionts. *Phycologia*. 1989;28(2):252–67. <https://doi.org/10.2216/i0031-8884-28-2-252.1> data-time="1761634709243" data-username="hiroko.toyooka.37@hosei.ac.jp" data-roldename="Author">
27. Nozaki H, Mori T, Misumi O, Matsunaga S, Kuroiwa T. Males evolved from the dominant isogametic mating type. *Curr Biol*. 2006;16(24):R1018–20. <https://doi.org/10.1016/j.cub.2006.11.019> PMID: [17174904](#)
28. Nozaki H, Ott FD, Coleman AW. Morphology, molecular phylogeny and taxonomy of two new species of *Pleodorina* (volvocae, chlorophyceae). *Journal of Phycology*. 2006;42(5):1072–80. <https://doi.org/10.1111/j.1529-8817.2006.00255.x>
29. Takahashi K, Kawai-Toyooka H, Ootsuki R, Hamaji T, Tsuchikane Y, Sekimoto H, et al. Three sex phenotypes in a haploid algal species give insights into the evolutionary transition to a self-compatible mating system. *Evolution*. 2021;75(11):2984–93. <https://doi.org/10.1111/evo.14306> PMID: [34250602](#)
30. Geng S, De Hoff P, Umen JG. Evolution of sexes from an ancestral mating-type specification pathway. *PLoS Biol*. 2014;12(7):e1001904. <https://doi.org/10.1371/journal.pbio.1001904> PMID: [25003332](#)

31. Geng S, Miyagi A, Umen JG. Evolutionary divergence of the sex-determining gene *MID* uncoupled from the transition to anisogamy in volvocine algae. *Development*. 2018;145(7). <https://doi.org/10.1242/dev.162537>
32. Geng S, Hamaji T, Ferris PJ, Gao M, Nishimura Y, Umen J. A conserved RWP-RK transcription factor VSR1 controls gametic differentiation in volvocine algae. *Proc Natl Acad Sci USA*. 2023;120(29). <https://doi.org/10.1073/pnas.2305099120>
33. Isaka N, Kawai-Toyooka H, Matsuzaki R, Nakada T, Nozaki H. Description of two new monoecious species of *Volvox* sect. *Volvox* (Volvocaceae, Chlorophyceae), based on comparative morphology and molecular phylogeny of cultured material. *J Phycol*. 2012;48(3):759–67. <https://doi.org/10.1111/j.1529-8817.2012.01142.x> PMID: 27011093
34. Yamamoto K, Kawai-Toyooka H, Hamaji T, Tsuchikane Y, Mori T, Takahashi F, et al. Molecular evolutionary analysis of a gender-limited *MID* ortholog from the homothallic species *Volvox africanus* with male and monoecious spheroids. *PLoS One*. 2017;12(6):e0180313. <https://doi.org/10.1371/journal.pone.0180313> PMID: 28665990
35. Nozaki H, Ueki N, Misumi O, Yamamoto K, Yamashita S, Herron MD, et al. Morphology and reproduction of *Volvox capensis* (Volvocales, Chlorophyceae) from Montana, USA. *Phycologia*. 2015;54:316–20. <https://doi.org/10.2216/15-14.1>
36. Nozaki H, Matsuzaki R, Shimotori K, Ueki N, Heman W, Mahakham W, et al. Two species of the green algae *Volvox* sect. *Volvox* from the Japanese ancient lake, Lake Biwa. *PLoS ONE*. 2024;19(9):e0310549. <https://doi.org/10.1371/journal.pone.0310549>
37. Kimbara R, Isaka N, Matsuzaki R, Kawai-Toyooka H, Kawachi M, Nozaki H. Morphological and molecular identification of the dioecious “African species” *Volvox rousseletii* (Chlorophyceae) in the water column of a Japanese lake based on field-collected and cultured materials. *PLoS One*. 2019;14(8):e0221632. <https://doi.org/10.1371/journal.pone.0221632> PMID: 31465476
38. Coleman AW. Sexuality in colonial green flagellates. In: Levandowsky M, Hunter SH. *Physiology and biochemistry of the protozoa*. 2nd ed: Academic Press; 1979. 307–340.
39. Jiménez-Marín B, Rakijas JB, Tyagi A, Pandey A, Hanschen ER, Anderson J, et al. Gene loss during a transition to multicellularity. *Sci Rep*. 2023;13(1). <https://doi.org/10.1038/s41598-023-29742-2>
40. Kasai F, Kawachi M, Erata M, Mori F, Yumoto K, Sato M. NIES-collection list of strains, 8th edition. *Jpn J Phycol*. 2009;57:1–350.
